# Supplementary material for: Contribution of FKBP5 Genetic Variation to Gemcitabine Treatment and Survival in Pancreatic Adenocarcinoma
Source: PubMed Central journal article supplement (PMC3731355; doi:10.1371/journal.pone.0070216), 2013-08-01

# Figure S1

## A

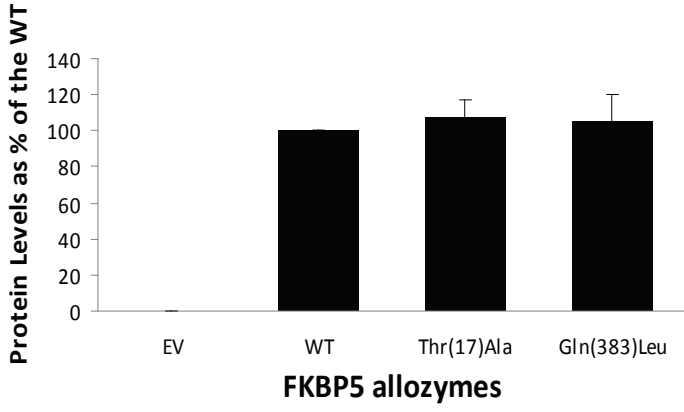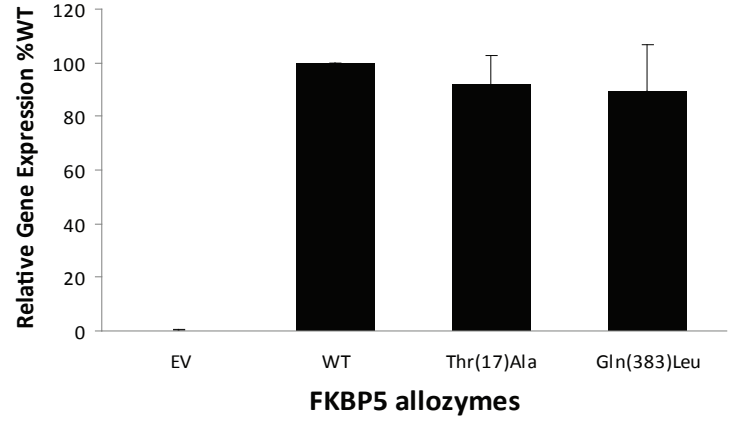

## B

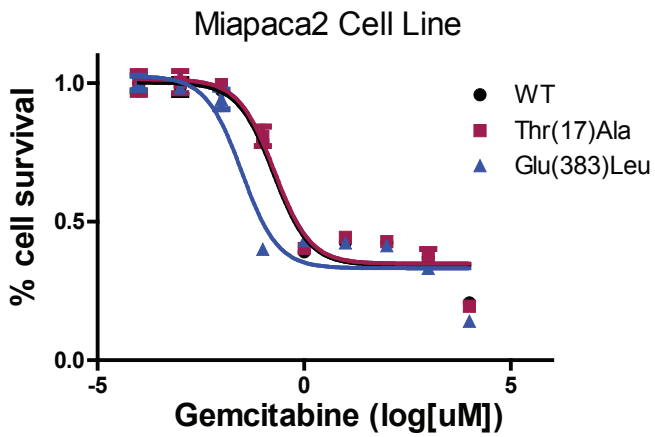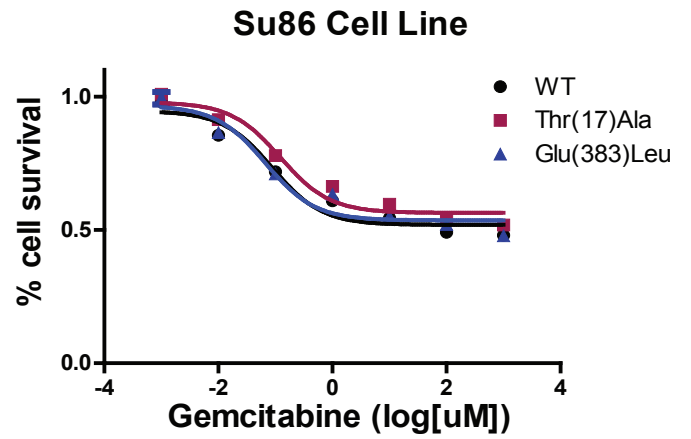

Supplement: pone.0070216.s001.pdf [file pone.0070216.s001.pdf]
