# Supplementary material for: Contribution of FKBP5 Genetic Variation to Gemcitabine Treatment and Survival in Pancreatic Adenocarcinoma
Source: PubMed Central journal article supplement (PMC3731355; doi:10.1371/journal.pone.0070216), 2013-08-01
Supplement: pone.0070216.s004.pdf [file pone.0070216.s004.pdf]

**Table S1.** Demographic information for pancreatic cancer patients used in this study.

| <b>Patient Information</b>       | <b>Statistic or group</b>           | <b>Value or N(%)<br/>Individuals</b> |
|----------------------------------|-------------------------------------|--------------------------------------|
| Age at Pancreas Cancer Diagnosis | n (# missing)                       | 43 (0)                               |
|                                  | Mean (SD)                           | 64.91 (10.64)                        |
|                                  | Median (min:max)                    | 66.0 (41.0 : 84.0)                   |
|                                  | 95% CI for mean (t-based)           | (61.63, 68.18)                       |
| Race                             | caucasian                           | 42 (97.7)                            |
|                                  | multi-racial                        | 1 (2.3)                              |
| Gender                           | Female                              | 16 ( 37.2)                           |
|                                  | Male                                | 27 (62.8)                            |
| Smokes                           | No                                  | 22 (53.7)                            |
|                                  | Yes                                 | 19 (46.3)                            |
| Pack Years                       | n (# missing)                       | 19 (24)                              |
|                                  | Mean (SD)                           | 32.89 (25.77)                        |
|                                  | Median (min:max)                    | 24.0 (0.0 : 80.0)                    |
|                                  | 95% CI for mean (t-based)           | (20.47, 45.31)                       |
| Stage                            | IB                                  | 0 (0.0)                              |
|                                  | II                                  | 0 (0.0)                              |
|                                  | IIA                                 | 10 (23.3)                            |
|                                  | IIB                                 | 33 (76.7)                            |
| Surgery type                     | Whipple                             | 36 (83.7)                            |
|                                  | Distal pancreatectomy               | 6 (14.0)                             |
|                                  | Whipple + palliative surgery/bypass | 0 (0.0)                              |
|                                  | Whipple + other                     | 1 ( 2.3)                             |
| Radiation Reported               | No                                  | 3 (7.0)                              |
|                                  | Yes                                 | 40 (93.0)                            |
| Other chemotherapy drug          | No                                  | 4 ( 9.3)                             |
|                                  | Yes                                 | 39 (90.7)                            |
| Gemcitabine Duration (days)      | n (# missing)                       | 43 (0)                               |
|                                  | Mean (SD)                           | 97.21 (74.21)                        |
|                                  | Median (min:max)                    | 87.0 (7.0 : 344.0)                   |
|                                  | 95% CI for mean (t-based)           | (74.37,120.05)                       |
