# Supplementary material for: Contribution of FKBP5 Genetic Variation to Gemcitabine Treatment and Survival in Pancreatic Adenocarcinoma
Source: PubMed Central journal article supplement (PMC3731355; doi:10.1371/journal.pone.0070216), 2013-08-01
Supplement: pone.0070216.s005.pdf [file pone.0070216.s005.pdf]

**Table S2.** List of Next Generation resequenced FKBP5 SNPs. SNPs were compared against databases, such as dbSNP and the “1000 Genomes Project” with “NA” indicating that they were novel to this resequencing study. The gene location described as “Exon 1b”, “Intron 1b” and “Intron 2b” refers to a longer transcript of FKBP5, BC042605; other gene locations refer to transcript NM\_004117.2. Transcription Factor Binding Site: score 0-1000 indicated the signal strength observed in any cell line based on the ENCODE ChIP-seq (chromatin immunoprecipitation with antibodies specific to the transcription factor followed by sequencing of the precipitated DNA) (NCBI36/hg18). Abbreviations: MAF, Minor Allele Frequency; SNP, single nucleotide polymorphism.

| SNPs in databases | MAF   | Genomic position;<br>hg18 | Genomic position;<br>hg19 | rs ID                              | Gene location | Transcription Factor Binding Site |
|-------------------|-------|---------------------------|---------------------------|------------------------------------|---------------|-----------------------------------|
| dbSNP/1000 Gen.   | 0.406 | 35804864                  | 35696886                  | rs2766537,rs181508114              | 5'FR          | Score=288;Ini1                    |
| 1000 Genomes      | 0.031 | 35804704                  | 35696726                  | rs143229535                        | 5'FR          | Score=555;c-Myc                   |
| dbSNP/1000 Gen.   | 0.313 | 35804341                  | 35696363                  | rs2817035                          | 5'FR          | Score=1000;GR,HEY1                |
| dbSNP/1000 Gen.   | <0.01 | 35804267                  | 35696289                  | rs2817033,rs2817034                | Exon 1b       | Score=1000;TCF12,GR,HEY1          |
| dbSNP/1000 Gen.   | 0.406 | 35804257                  | 35696279                  | rs2817033,rs2817034                | Intron 1b     | Score=1000;TCF12,GR,HEY1          |
| dbSNP/1000 Gen.   | 0.125 | 35803569                  | 35695591                  | rs28435135                         | Intron 1b     | Score=1000;TCF12,GR,HEY1,USF-1    |
| NA                | <0.01 | 35803548                  | 35695570                  | NA                                 | Intron 1b     | Score=1000;GR,HEY1,USF-1          |
| dbSNP/1000 Gen.   | 0.313 | 35803519                  | 35695541                  | rs2766536                          | Intron 1b     | Score=1000;GR,HEY1,USF-1          |
| dbSNP/1000 Gen.   | 0.031 | 35803252                  | 35695274                  | rs7751693                          | Intron 1b     | Score=1000;GR,HEY1,USF-1          |
| dbSNP/1000 Gen.   | <0.01 | 35803171                  | 35695193                  | rs75552415,rs192417627             | Intron 1b     | Score=1000;GR,HEY1,USF-1          |
| dbSNP/1000 Gen.   | 0.250 | 35802904                  | 35694926                  | rs10947565,rs140967114             | Intron 1b     | Score=1000;GR                     |
| dbSNP/1000 Gen.   | 0.031 | 35802555                  | 35694577                  | rs77677939                         | Intron 1b     | Score=1000;GR                     |
| dbSNP/1000 Gen.   | 0.063 | 35802223                  | 35694245                  | rs76917354,rs191346255             | Intron 1b     | Score=1000;GR                     |
| dbSNP/1000 Gen.   | <0.01 | 35802128                  | 35694150                  | rs115927448                        | Intron 1b     | Score=1000;GR                     |
| dbSNP/1000 Gen.   | 0.250 | 35800906                  | 35692928                  | rs12203716                         | Intron 1b     | NA                                |
| 1000 Genomes      | <0.01 | 35800163                  | 35692185                  | rs191629931                        | Intron 1b     | NA                                |
| dbSNP/1000 Gen.   | 0.438 | 35799760                  | 35691782                  | rs2766535                          | Intron 1b     | NA                                |
| dbSNP/1000 Gen.   | 0.281 | 35799618                  | 35691640                  | rs4236047                          | Intron 1b     | NA                                |
| dbSNP/1000 Gen.   | 0.031 | 35799414                  | 35691436                  | rs114304008                        | Intron 1b     | NA                                |
| dbSNP/1000 Gen.   | 0.031 | 35799311                  | 35691333                  | rs78220087                         | Intron 1b     | NA                                |
| 1000 Genomes      | <0.01 | 35798367                  | 35690389                  | rs148378472                        | Intron 1b     | Score=1000;GR                     |
| dbSNP/1000 Gen.   | 0.250 | 35797848                  | 35689870                  | rs112633560,rs145112268,rs56362135 | Intron 1b     | NA                                |
| dbSNP/1000 Gen.   | 0.188 | 35797810                  | 35689832                  | rs13198515                         | Intron 1b     | NA                                |
| dbSNP/1000 Gen.   | 0.250 | 35797771                  | 35689793                  | rs114531119,rs12206670             | Intron 1b     | NA                                |
| dbSNP/1000 Gen.   | 0.031 | 35797716                  | 35689738                  | rs77168471                         | Intron 1b     | NA                                |
| dbSNP/1000 Gen.   | 0.031 | 35797371                  | 35689393                  | rs7747780                          | Intron 1b     | NA                                |
| NA                | 0.469 | 35797219                  | 35689241                  | NA                                 | Intron 1b     | NA                                |
| 1000 Genomes      | 0.344 | 35797103                  | 35689125                  | rs11372409                         | Intron 1b     | NA                                |
| 1000 Genomes      | 0.250 | 35796661                  | 35688683                  | rs144748999,rs144356848,rs10710071 | Intron 1b     | NA                                |
| dbSNP/1000 Gen.   | 0.281 | 35796597                  | 35688619                  | rs2817032                          | Intron 1b     | Score=246;NFKB                    |
| 1000 Genomes      | <0.01 | 35796280                  | 35688302                  | rs182725566                        | Intron 1b     | Score=570;Ini1                    |
| 1000 Genomes      | 0.031 | 35795936                  | 35687958                  | rs112209535,rs113902616            | Intron 1b     | Score=1000;PU.1                   |
| dbSNP/1000 Gen.   | 0.031 | 35795915                  | 35687937                  | rs77379145                         | Intron 2b     | Score=1000;PU.1                   |
| 1000 Genomes      | <0.01 | 35795815                  | 35687837                  | rs183347446,rs35951655             | Intron 2b     | Score=1000;PU.1                   |
| dbSNP/1000 Gen.   | 0.313 | 35795227                  | 35687249                  | rs9348981                          | Intron 2b     | Score=322;EBF                     |
| dbSNP/1000 Gen.   | <0.01 | 35794922                  | 35686944                  | rs73729770,rs34581862              | Intron 2b     | Score=246;NFKB                    |
| 1000 Genomes      | 0.031 | 35794718                  | 35686740                  | rs75941623                         | Intron 2b     | Score=282;TCF12                   |
| dbSNP/1000 Gen.   | 0.031 | 35794415                  | 35686437                  | rs6914582                          | Intron 2b     | Score=450;PU.1                    |

|                 |       |          |          |                                            |           |                 |
|-----------------|-------|----------|----------|--------------------------------------------|-----------|-----------------|
| dbSNP/1000 Gen. | 0.031 | 35794369 | 35686391 | rs6914554                                  | Intron 2b | Score=450;PU.1  |
| 1000 Genomes    | 0.031 | 35794152 | 35686174 | rs143262325                                | Intron 2b | Score=450;PU.1  |
| dbSNP/1000 Gen. | 0.250 | 35793933 | 35685955 | rs12200498                                 | Intron 2b | Score=450;PU.1  |
| dbSNP/1000 Gen. | 0.188 | 35793692 | 35685714 | rs2766534                                  | Intron 2b | NA              |
| dbSNP/1000 Gen. | 0.500 | 35793468 | 35685490 | rs2766533                                  | Intron 2b | NA              |
| dbSNP/1000 Gen. | 0.250 | 35793171 | 35685193 | rs2817031,rs147048411                      | Intron 2b | Score=534;Max   |
| dbSNP/1000 Gen. | 0.250 | 35792818 | 35684840 | rs2766532                                  | Intron 2b | NA              |
| 1000 Genomes    | 0.281 | 35792527 | 35684549 | rs34618058                                 | Intron 2b | NA              |
| dbSNP/1000 Gen. | 0.313 | 35791526 | 35683548 | rs4711429                                  | Intron 2b | Score=1000;GR   |
| dbSNP/1000 Gen. | 0.313 | 35791037 | 35683059 | rs9394314                                  | Intron 2b | NA              |
| dbSNP/1000 Gen. | <0.01 | 35789861 | 35681883 | rs73729766,rs186745286                     | Intron 2b | NA              |
| dbSNP/1000 Gen. | 0.313 | 35789755 | 35681777 | rs4713921                                  | Intron 2b | NA              |
| dbSNP/1000 Gen. | <0.01 | 35789706 | 35681728 | rs57599664                                 | Intron 2b | NA              |
| dbSNP/1000 Gen. | 0.313 | 35788084 | 35680106 | rs6909804                                  | Intron 2b | NA              |
| NA              | <0.01 | 35787976 | 35679998 | NA                                         | Intron 2b | NA              |
| 1000 Genomes    | 0.031 | 35787670 | 35679692 | rs143018638                                | Intron 2b | Score=320;CEBPB |
| NA              | 0.031 | 35787509 | 35679531 | NA                                         | Intron 2b | NA              |
| dbSNP/1000 Gen. | 0.438 | 35786601 | 35678623 | rs4713920,rs4711428,rs74370322             | Intron 2b | NA              |
| dbSNP/1000 Gen. | 0.313 | 35786597 | 35678619 | rs4713920,rs4711428,rs74370322             | Intron 2b | NA              |
| 1000 Genomes    | 0.031 | 35786126 | 35678148 | rs144583297                                | Intron 2b | Score=438;c-Fos |
| dbSNP/1000 Gen. | <0.01 | 35786032 | 35678054 | rs187009689,rs58580399                     | Intron 2b | Score=438;c-Fos |
| dbSNP/1000 Gen. | <0.01 | 35785763 | 35677785 | rs77644320,rs114807361                     | Intron 2b | Score=137;STAT1 |
| 1000 Genomes    | <0.01 | 35785508 | 35677530 | rs184680207                                | Intron 2b | NA              |
| dbSNP/1000 Gen. | 0.313 | 35785031 | 35677053 | rs4711427                                  | Intron 2b | NA              |
| dbSNP/1000 Gen. | 0.313 | 35785005 | 35677027 | rs184957353,rs4711426                      | Intron 2b | NA              |
| dbSNP/1000 Gen. | 0.313 | 35784969 | 35676991 | rs4713919,rs192178086                      | Intron 2b | NA              |
| dbSNP/1000 Gen. | 0.313 | 35784863 | 35676885 | rs4713918                                  | Intron 2b | NA              |
| dbSNP/1000 Gen. | 0.469 | 35784332 | 35676354 | rs34417388,rs74632259,rs71002596           | Intron 2b | NA              |
| dbSNP/1000 Gen. | 0.313 | 35784296 | 35676318 | rs6457842,rs182985165                      | Intron 2b | NA              |
| dbSNP/1000 Gen. | 0.313 | 35783851 | 35675873 | rs6905674                                  | Intron 2b | NA              |
| dbSNP/1000 Gen. | 0.375 | 35783674 | 35675696 | rs9380529                                  | Intron 2b | NA              |
| dbSNP/1000 Gen. | 0.344 | 35783639 | 35675661 | rs6900592                                  | Intron 2b | NA              |
| 1000 Genomes    | <0.01 | 35783584 | 35675606 | rs149588390                                | Intron 2b | NA              |
| dbSNP/1000 Gen. | 0.250 | 35783557 | 35675579 | rs55694295                                 | Intron 2b | NA              |
| 1000 Genomes    | <0.01 | 35783272 | 35675294 | rs186264450,rs144864436                    | Intron 2b | NA              |
| NA              | <0.01 | 35783168 | 35675190 | NA                                         | Intron 2b | NA              |
| dbSNP/1000 Gen. | 0.344 | 35783059 | 35675081 | rs185998144,rs9296160                      | Intron 2b | NA              |
| dbSNP/1000 Gen. | 0.375 | 35783013 | 35675035 | rs9470084                                  | Intron 2b | NA              |
| dbSNP/1000 Gen. | 0.344 | 35782823 | 35674845 | rs9462104                                  | Intron 2b | NA              |
| dbSNP/1000 Gen. | 0.313 | 35782595 | 35674617 | rs9394313                                  | Intron 2b | Score=701;c-Jun |
| dbSNP/1000 Gen. | 0.469 | 35781310 | 35673332 | rs13213010                                 | Intron 2b | NA              |
| 1000 Genomes    | <0.01 | 35780890 | 35672912 | rs184569594                                | Intron 2b | NA              |
| 1000 Genomes    | 0.031 | 35780536 | 35672558 | rs192409932                                | Intron 2b | NA              |
| dbSNP/1000 Gen. | 0.375 | 35780465 | 35672487 | rs34727090,rs58212271,rs77399846           | Intron 2b | NA              |
| 1000 Genomes    | <0.01 | 35780435 | 35672457 | rs187639919                                | Intron 2b | NA              |
| dbSNP/1000 Gen. | 0.469 | 35780348 | 35672370 | s142075046,rs35718174,rs77043892,rs5780813 | Intron 2b | NA              |

|                 |       |          |          |                                                  |           |                  |
|-----------------|-------|----------|----------|--------------------------------------------------|-----------|------------------|
| dbSNP/1000 Gen. | 0.469 | 35780308 | 35672330 | rs9394312                                        | Intron 2b | NA               |
| NA              | <0.01 | 35779935 | 35671957 | NA                                               | Intron 2b | NA               |
| 1000 Genomes    | <0.01 | 35779689 | 35671711 | rs76669992,rs191917844,rs184760557               | Intron 2b | NA               |
| dbSNP/1000 Gen. | 0.250 | 35779629 | 35671651 | rs10456432                                       | Intron 2b | Score=1000;USF-1 |
| dbSNP/1000 Gen. | 0.375 | 35779143 | 35671165 | rs2395635                                        | Intron 2b | NA               |
| dbSNP/1000 Gen. | 0.438 | 35778999 | 35671021 | rs7745324                                        | Intron 2b | NA               |
| dbSNP/1000 Gen. | 0.469 | 35778585 | 35670607 | rs6902321                                        | Intron 2b | NA               |
| dbSNP/1000 Gen. | 0.250 | 35778454 | 35670476 | rs12190582                                       | Intron 2b | NA               |
| NA              | <0.01 | 35778443 | 35670465 | NA                                               | Intron 2b | NA               |
| 1000 Genomes    | 0.250 | 35778129 | 35670151 | 49392522,rs35311317,rs148861980,rs11243774       | Intron 2b | NA               |
| 1000 Genomes    | 0.063 | 35778124 | 35670146 | 64,rs149392522,rs35311317,rs148861980,rs11243774 | Intron 2b | NA               |
| dbSNP/1000 Gen. | 0.375 | 35777961 | 35669983 | rs4713916                                        | Intron 2b | NA               |
| NA              | 0.031 | 35777852 | 35669874 | NA                                               | Intron 2b | NA               |
| 1000 Genomes    | 0.031 | 35777525 | 35669547 | rs144827927                                      | Intron 2b | NA               |
| dbSNP/1000 Gen. | 0.406 | 35777288 | 35669310 | rs9470082,rs4713915,rs184867022,rs18995787       | Intron 2b | NA               |
| dbSNP/1000 Gen. | 0.031 | 35777278 | 35669300 | rs9470082,rs4713915                              | Intron 2b | NA               |
| dbSNP/1000 Gen. | 0.406 | 35777122 | 35669144 | rs4713914,rs75172019                             | Intron 2b | NA               |
| dbSNP/1000 Gen. | 0.406 | 35776563 | 35668585 | rs9394311                                        | Intron 2b | NA               |
| 1000 Genomes    | <0.01 | 35776478 | 35668500 | rs186976823,rs140078496,rs143691075              | Intron 2b | NA               |
| 1000 Genomes    | <0.01 | 35776462 | 35668484 | rs183344228                                      | Intron 2b | NA               |
| 1000 Genomes    | 0.031 | 35776273 | 35668295 | rs183557661,rs145987281                          | Intron 2b | NA               |
| 1000 Genomes    | 0.031 | 35776119 | 35668141 | rs115646474                                      | Intron 2b | NA               |
| dbSNP/1000 Gen. | 0.375 | 35775969 | 35667991 | rs12153967                                       | Intron 2b | NA               |
| dbSNP/1000 Gen. | 0.375 | 35775838 | 35667860 | rs943297                                         | Intron 2b | NA               |
| dbSNP/1000 Gen. | 0.031 | 35774523 | 35666545 | rs77319078                                       | Intron 2b | NA               |
| dbSNP/1000 Gen. | 0.031 | 35773746 | 35665768 | rs13340463                                       | Intron 2b | NA               |
| dbSNP/1000 Gen. | 0.438 | 35773174 | 35665196 | rs4713911                                        | Intron 2b | NA               |
| dbSNP/1000 Gen. | 0.031 | 35772983 | 35665005 | rs80179277                                       | Intron 2b | NA               |
| 1000 Genomes    | <0.01 | 35772531 | 35664553 | rs147130038                                      | Intron 2b | NA               |
| dbSNP/1000 Gen. | 0.344 | 35772230 | 35664252 | rs137986902,rs9380528                            | Intron 2b | NA               |
| NA              | <0.01 | 35772111 | 35664133 | NA                                               | Intron 2b | NA               |
| NA              | 0.031 | 35771396 | 35663418 | NA                                               | Intron 2b | NA               |
| 1000 Genomes    | 0.031 | 35771004 | 35663026 | rs184981757,rs150456373                          | Intron 2b | NA               |
| dbSNP/1000 Gen. | 0.375 | 35770631 | 35662653 | rs56311918                                       | Intron 2b | Score=1000;JunD  |
| dbSNP/1000 Gen. | 0.375 | 35770084 | 35662106 | rs7763535                                        | Intron 2b | NA               |
| dbSNP/1000 Gen. | 0.250 | 35770010 | 35662032 | rs55987213                                       | Intron 2b | NA               |
| 1000 Genomes    | 0.031 | 35769956 | 35661978 | rs146257681                                      | Intron 2b | NA               |
| dbSNP/1000 Gen. | 0.375 | 35769797 | 35661819 | rs7759392                                        | Intron 2b | NA               |
| dbSNP/1000 Gen. | 0.219 | 35769411 | 35661433 | rs35253763,rs144395988,rs114191749               | Intron 2b | NA               |
| NA              | 0.031 | 35769207 | 35661229 | NA                                               | Intron 2b | NA               |
| 1000 Genomes    | 0.063 | 35768679 | 35660701 | rs147225648,rs140576483                          | Intron 2b | NA               |
| 1000 Genomes    | <0.01 | 35768574 | 35660596 | rs71002588,rs187208328                           | Intron 2b | NA               |
| dbSNP/1000 Gen. | 0.031 | 35767825 | 35659847 | rs78695908,rs62402145                            | Intron 2b | NA               |
| 1000 Genomes    | <0.01 | 35767224 | 35659246 | rs141203278                                      | Intron 2b | Score=80;USF-1   |
| dbSNP/1000 Gen. | 0.375 | 35766622 | 35658644 | rs9368885,rs138974591                            | Intron 2b | NA               |
| 1000 Genomes    | 0.031 | 35766403 | 35658425 | rs141436620,rs185669307                          | Intron 2b | NA               |

|                 |       |          |          |                                               |           |                                 |
|-----------------|-------|----------|----------|-----------------------------------------------|-----------|---------------------------------|
| dbSNP/1000 Gen. | 0.375 | 35766305 | 35658327 | rs9380526                                     | Intron 2b | NA                              |
| dbSNP/1000 Gen. | 0.375 | 35764541 | 35656563 | rs9462103                                     | UTR5      | Score=1000;SP1,HEY1,TAF1,POU2F2 |
| dbSNP/1000 Gen. | 0.219 | 35764409 | 35656431 | rs13215797                                    | Intron 1  | Score=1000;HEY1,TAF1,POU2F2     |
| NA              | <0.01 | 35764231 | 35656253 | NA                                            | Intron 1  | Score=1000;HEY1,BAF170,TAF1     |
| 1000 Genomes    | <0.01 | 35763962 | 35655984 | rs10947564,rs111406566                        | Intron 1  | Score=1000;BAF170,TAF1          |
| dbSNP/1000 Gen. | 0.094 | 35763952 | 35655974 | rs10947564                                    | Intron 1  | Score=1000;BAF170,TAF1          |
| dbSNP/1000 Gen. | 0.375 | 35763223 | 35655245 | rs3800372                                     | Intron 1  | Score=594;PU.1                  |
| dbSNP/1000 Gen. | 0.375 | 35761415 | 35653437 | rs189114608,rs146123716,rs10947563            | Intron 1  | NA                              |
| dbSNP/1000 Gen. | <0.01 | 35760898 | 35652920 | rs115634614                                   | Intron 1  | NA                              |
| 1000 Genomes    | <0.01 | 35760871 | 35652893 | rs77444496,rs187624235                        | Intron 1  | NA                              |
| dbSNP/1000 Gen. | <0.01 | 35760821 | 35652843 | rs74432203,rs34110646                         | Intron 1  | NA                              |
| dbSNP/1000 Gen. | 0.344 | 35760816 | 35652838 | rs74432203,rs34110646                         | Intron 1  | NA                              |
| dbSNP/1000 Gen. | 0.438 | 35759965 | 35651987 | rs6899478                                     | Intron 1  | NA                              |
| 1000 Genomes    | 0.031 | 35759261 | 35651283 | rs147614773                                   | Intron 1  | NA                              |
| dbSNP/1000 Gen. | 0.031 | 35759185 | 35651207 | rs76019376                                    | Intron 1  | NA                              |
| 1000 Genomes    | 0.031 | 35758265 | 35650287 | rs142232122,rs151229770                       | Intron 1  | NA                              |
| 1000 Genomes    | 0.031 | 35758047 | 35650069 | rs34218355                                    | Intron 1  | NA                              |
| dbSNP/1000 Gen. | 0.375 | 35756808 | 35648830 | rs6457839                                     | Intron 1  | NA                              |
| 1000 Genomes    | 0.031 | 35756071 | 35648093 | rs142989415                                   | Intron 1  | NA                              |
| 1000 Genomes    | <0.01 | 35755572 | 35647594 | rs185290009                                   | Intron 1  | NA                              |
| dbSNP/1000 Gen. | 0.031 | 35755288 | 35647310 | rs4713908                                     | Intron 1  | NA                              |
| dbSNP/1000 Gen. | 0.406 | 35754413 | 35646435 | rs9470080,rs183332973                         | Intron 1  | NA                              |
| dbSNP/1000 Gen. | 0.406 | 35753063 | 35645085 | rs7758906                                     | Intron 1  | NA                              |
| dbSNP/1000 Gen. | 0.031 | 35751701 | 35643723 | rs73748221                                    | Intron 1  | NA                              |
| dbSNP/1000 Gen. | 0.031 | 35751398 | 35643420 | rs6931036,rs73748220                          | Intron 1  | NA                              |
| dbSNP/1000 Gen. | 0.031 | 35751395 | 35643417 | rs6931036,rs73748220                          | Intron 1  | NA                              |
| 1000 Genomes    | <0.01 | 35751293 | 35643315 | rs141473268                                   | Intron 1  | NA                              |
| 1000 Genomes    | 0.031 | 35751239 | 35643261 | rs148234137                                   | Intron 1  | NA                              |
| dbSNP/1000 Gen. | 0.031 | 35751053 | 35643075 | rs4713907                                     | Intron 1  | NA                              |
| dbSNP/1000 Gen. | 0.094 | 35751041 | 35643063 | rs9470079                                     | Intron 1  | NA                              |
| dbSNP/1000 Gen. | <0.01 | 35749202 | 35641224 | rs75477235                                    | Intron 1  | NA                              |
| 1000 Genomes    | <0.01 | 35748720 | 35640742 | rs185571730,rs190226916,rs143224792           | Intron 1  | NA                              |
| 1000 Genomes    | 0.188 | 35748516 | 35640538 | rs135,rs11399067,rs71830530,rs139485621,rs145 | Intron 1  | NA                              |
| NA              | 0.031 | 35748247 | 35640269 | NA                                            | Intron 1  | NA                              |
| 1000 Genomes    | <0.01 | 35747785 | 35639807 | rs142423206                                   | Intron 1  | NA                              |
| 1000 Genomes    | 0.031 | 35747671 | 35639693 | rs9394310,rs182596274                         | Intron 1  | NA                              |
| dbSNP/1000 Gen. | 0.438 | 35747666 | 35639688 | rs9394310,rs182596274                         | Intron 1  | NA                              |
| dbSNP/1000 Gen. | 0.031 | 35747387 | 35639409 | rs184663706                                   | Intron 1  | NA                              |
| dbSNP/1000 Gen. | 0.313 | 35746954 | 35638976 | rs9368882                                     | Intron 1  | NA                              |
| dbSNP/1000 Gen. | 0.031 | 35743496 | 35635518 | rs7752084                                     | Intron 1  | NA                              |
| dbSNP/1000 Gen. | <0.01 | 35742835 | 35634857 | rs189097850                                   | Intron 1  | NA                              |
| 1000 Genomes    | <0.01 | 35742452 | 35634474 | rs76065176                                    | Intron 1  | NA                              |
| dbSNP/1000 Gen. | 0.406 | 35742266 | 35634288 | rs9368881                                     | Intron 1  | NA                              |
| dbSNP/1000 Gen. | <0.01 | 35741434 | 35633456 | rs13192954                                    | Intron 1  | Score=58;NFKB                   |
| dbSNP/1000 Gen. | 0.406 | 35741016 | 35633038 | rs9380525                                     | Intron 1  | NA                              |
| dbSNP/1000 Gen. | <0.01 | 35740895 | 35632917 | rs75710780                                    | Intron 1  | Score=72;NFKB                   |

|                 |       |          |          |                                             |          |                |
|-----------------|-------|----------|----------|---------------------------------------------|----------|----------------|
| 1000 Genomes    | 0.125 | 35740361 | 35632383 | rs137977904                                 | Intron 1 | NA             |
| 1000 Genomes    | 0.031 | 35739970 | 35631992 | rs34853875                                  | Intron 1 | NA             |
| dbSNP/1000 Gen. | 0.063 | 35737387 | 35629409 | rs111816824,rs111348833,rs112972898         | Intron 1 | NA             |
| dbSNP/1000 Gen. | 0.063 | 35737296 | 35629318 | rs111927248                                 | Intron 1 | NA             |
| dbSNP/1000 Gen. | 0.063 | 35737178 | 35629200 | rs7747647                                   | Intron 1 | NA             |
| 1000 Genomes    | <0.01 | 35736502 | 35628524 | rs151038510,rs111367541                     | Intron 1 | NA             |
| dbSNP/1000 Gen. | 0.063 | 35736456 | 35628478 | rs4713905,rs188123934                       | Intron 1 | NA             |
| 1000 Genomes    | 0.031 | 35735759 | 35627781 | rs148451847                                 | Intron 1 | NA             |
| dbSNP/1000 Gen. | 0.063 | 35735245 | 35627267 | rs7775489                                   | Intron 1 | NA             |
| dbSNP/1000 Gen. | 0.063 | 35734910 | 35626932 | rs77253887                                  | Intron 1 | NA             |
| dbSNP/1000 Gen. | 0.063 | 35734478 | 35626500 | rs4711425                                   | Intron 1 | NA             |
| dbSNP/1000 Gen. | 0.219 | 35733914 | 35625936 | rs13215497                                  | Intron 1 | NA             |
| dbSNP/1000 Gen. | 0.406 | 35733683 | 35625705 | rs6929523                                   | Intron 1 | NA             |
| dbSNP/1000 Gen. | <0.01 | 35733616 | 35625638 | rs79476859                                  | Intron 1 | NA             |
| dbSNP/1000 Gen. | 0.406 | 35733125 | 35625147 | rs4713904                                   | Intron 1 | NA             |
| dbSNP/1000 Gen. | 0.469 | 35732811 | 35624833 | rs35090133,rs71002584                       | Intron 1 | NA             |
| dbSNP/1000 Gen. | 0.250 | 35732689 | 35624711 | rs13207605,rs12197246                       | Intron 1 | NA             |
| 1000 Genomes    | 0.125 | 35732606 | 35624628 | rs141720418,rs191631236                     | Intron 1 | NA             |
| dbSNP/1000 Gen. | 0.438 | 35732521 | 35624543 | rs9296159                                   | Intron 1 | NA             |
| NA              | <0.01 | 35732325 | 35624347 | NA                                          | Intron 1 | NA             |
| NA              | <0.01 | 35730418 | 35622440 | NA                                          | Intron 1 | NA             |
| dbSNP/1000 Gen. | 0.031 | 35730185 | 35622207 | rs2092427                                   | Intron 1 | NA             |
| dbSNP/1000 Gen. | 0.063 | 35729899 | 35621921 | rs17614642                                  | Intron 1 | NA             |
| dbSNP/1000 Gen. | 0.375 | 35729759 | 35621781 | rs9394309                                   | Intron 1 | NA             |
| 1000 Genomes    | 0.031 | 35728735 | 35620757 | rs183216045                                 | Intron 1 | NA             |
| 1000 Genomes    | <0.01 | 35728734 | 35620756 | rs183216045                                 | Intron 1 | NA             |
| dbSNP/1000 Gen. | 0.250 | 35728605 | 35620627 | rs10456431                                  | Intron 1 | NA             |
| dbSNP/1000 Gen. | 0.219 | 35728550 | 35620572 | rs11754441                                  | Intron 1 | NA             |
| dbSNP/1000 Gen. | 0.406 | 35728528 | 35620550 | rs6931118                                   | Intron 1 | NA             |
| NA              | <0.01 | 35728152 | 35620174 | NA                                          | Intron 1 | NA             |
| dbSNP/1000 Gen. | 0.375 | 35727956 | 35619978 | rs4544902                                   | Intron 1 | NA             |
| dbSNP/1000 Gen. | 0.031 | 35727532 | 35619554 | rs1475774                                   | Intron 1 | Score=474;Brg1 |
| dbSNP/1000 Gen. | <0.01 | 35726664 | 35618686 | rs77571794                                  | Intron 1 | Score=474;Brg1 |
| 1000 Genomes    | 0.063 | 35726280 | 35618302 | rs140253283                                 | Intron 1 | NA             |
| dbSNP/1000 Gen. | 0.375 | 35725799 | 35617821 | rs185661038,rs4713903                       | Intron 1 | NA             |
| dbSNP/1000 Gen. | 0.375 | 35725563 | 35617585 | rs6912833                                   | Intron 1 | NA             |
| dbSNP/1000 Gen. | 0.406 | 35725188 | 35617210 | 478,rs11414221,rs71725261,rs143661600,rs138 | Intron 1 | NA             |
| 1000 Genomes    | <0.01 | 35724864 | 35616886 | rs113425178,rs191016418                     | Intron 1 | NA             |
| dbSNP/1000 Gen. | 0.406 | 35724644 | 35616666 | rs9357201,rs9357202                         | Intron 1 | NA             |
| dbSNP/1000 Gen. | 0.063 | 35723845 | 35615867 | rs66503860,rs57126691                       | Intron 1 | NA             |
| dbSNP/1000 Gen. | 0.031 | 35723690 | 35615712 | rs181472746,rs9462100                       | Intron 1 | NA             |
| dbSNP/1000 Gen. | 0.063 | 35723108 | 35615130 | rs1334894                                   | Intron 1 | Score=103;PU.1 |
| 1000 Genomes    | <0.01 | 35722862 | 35614884 | rs188632512                                 | Intron 1 | NA             |
| dbSNP/1000 Gen. | 0.250 | 35722722 | 35614744 | rs17542466                                  | Intron 1 | NA             |
| 1000 Genomes    | 0.063 | 35722504 | 35614526 | rs140656232                                 | Intron 1 | NA             |
| dbSNP/1000 Gen. | 0.031 | 35722306 | 35614328 | rs187521165,rs59595954                      | Intron 1 | NA             |

|                 |       |          |          |                                             |          |                |
|-----------------|-------|----------|----------|---------------------------------------------|----------|----------------|
| dbSNP/1000 Gen. | 0.031 | 35722105 | 35614127 | rs73748211                                  | Intron 1 | NA             |
| dbSNP/1000 Gen. | 0.219 | 35722004 | 35614026 | rs4713902                                   | Intron 1 | NA             |
| dbSNP/1000 Gen. | 0.031 | 35721976 | 35613998 | rs7771722                                   | Intron 1 | NA             |
| dbSNP/1000 Gen. | 0.031 | 35721310 | 35613332 | rs73748209                                  | Intron 1 | NA             |
| dbSNP/1000 Gen. | 0.031 | 35721176 | 35613198 | rs9767565                                   | Intron 1 | NA             |
| 1000 Genomes    | <0.01 | 35720889 | 35612911 | rs148128369                                 | Intron 1 | Score=385;NFKB |
| NA              | 0.031 | 35719458 | 35611480 | NA                                          | Intron 1 | NA             |
| dbSNP/1000 Gen. | 0.250 | 35719210 | 35611232 | rs9394307,rs58549426                        | Intron 1 | NA             |
| dbSNP/1000 Gen. | 0.063 | 35718729 | 35610751 | rs12527329                                  | Intron 1 | NA             |
| dbSNP/1000 Gen. | 0.344 | 35718659 | 35610681 | rs2143404,rs35448780                        | Intron 1 | NA             |
| 1000 Genomes    | 0.031 | 35718531 | 35610553 | rs148043129                                 | Exon 2   | NA             |
| dbSNP/1000 Gen. | 0.031 | 35718318 | 35610340 | rs12110366                                  | Intron 2 | NA             |
| dbSNP/1000 Gen. | 0.438 | 35718286 | 35610308 | rs6902124,rs111511988                       | Intron 2 | NA             |
| dbSNP/1000 Gen. | 0.031 | 35718242 | 35610264 | rs187825034,rs113065020                     | Intron 2 | NA             |
| dbSNP/1000 Gen. | 0.219 | 35718193 | 35610215 | rs9348979,rs28558535                        | Intron 2 | NA             |
| dbSNP/1000 Gen. | 0.063 | 35717792 | 35609814 | rs7756437,rs142708384                       | Intron 2 | NA             |
| 1000 Genomes    | 0.031 | 35717519 | 35609541 | NA                                          | Intron 2 | NA             |
| 1000 Genomes    | 0.031 | 35716324 | 35608346 | NA                                          | Intron 2 | NA             |
| 1000 Genomes    | <0.01 | 35716217 | 35608239 | rs140140532                                 | Intron 2 | Score=1000;GR  |
| dbSNP/1000 Gen. | 0.063 | 35716074 | 35608096 | rs55922240                                  | Intron 2 | Score=1000;GR  |
| 1000 Genomes    | 0.031 | 35715938 | 35607960 | rs73748206,rs186158240                      | Intron 2 | Score=1000;GR  |
| dbSNP/1000 Gen. | 0.031 | 35715933 | 35607955 | rs73748206                                  | Intron 2 | Score=1000;GR  |
| dbSNP/1000 Gen. | 0.031 | 35715599 | 35607621 | rs7763114                                   | Intron 2 | NA             |
| dbSNP/1000 Gen. | 0.406 | 35715549 | 35607571 | rs1360780                                   | Intron 2 | NA             |
| 1000 Genomes    | 0.031 | 35715307 | 35607329 | rs115214997,rs188105805                     | Intron 2 | NA             |
| dbSNP/1000 Gen. | 0.031 | 35714379 | 35606401 | rs58873316                                  | Intron 2 | NA             |
| 1000 Genomes    | 0.031 | 35714013 | 35606035 | rs151140827                                 | Intron 2 | NA             |
| dbSNP/1000 Gen. | 0.406 | 35713178 | 35605200 | rs7751598                                   | Intron 2 | NA             |
| dbSNP/1000 Gen. | 0.031 | 35712673 | 35604695 | rs73748205                                  | Intron 3 | NA             |
| dbSNP/1000 Gen. | 0.313 | 35712623 | 35604645 | rs7746850                                   | Intron 3 | NA             |
| dbSNP/1000 Gen. | 0.406 | 35712085 | 35604107 | rs1591365                                   | Intron 3 | NA             |
| dbSNP/1000 Gen. | 0.031 | 35711567 | 35603589 | rs72921237                                  | Intron 3 | NA             |
| dbSNP/1000 Gen. | 0.313 | 35711097 | 35603119 | rs7760951                                   | Intron 3 | NA             |
| dbSNP/1000 Gen. | <0.01 | 35710973 | 35602995 | rs112754019                                 | Intron 3 | NA             |
| dbSNP/1000 Gen. | 0.344 | 35710950 | 35602972 | rs7740395                                   | Intron 3 | NA             |
| dbSNP/1000 Gen. | 0.406 | 35710471 | 35602493 | rs66500202,rs79702774,rs79193426,rs66907578 | Intron 3 | NA             |
| 1000 Genomes    | <0.01 | 35709774 | 35601796 | rs182564277                                 | Intron 3 | NA             |
| dbSNP/1000 Gen. | 0.406 | 35709754 | 35601776 | rs3798347                                   | Intron 3 | NA             |
| dbSNP/1000 Gen. | 0.031 | 35709507 | 35601529 | rs28675670                                  | Intron 3 | NA             |
| NA              | 0.031 | 35707732 | 35599754 | NA                                          | Intron 3 | NA             |
| dbSNP/1000 Gen. | 0.031 | 35705868 | 35597890 | rs74636231                                  | Intron 3 | NA             |
| dbSNP/1000 Gen. | 0.031 | 35705681 | 35597703 | rs16879378                                  | Intron 3 | NA             |
| dbSNP/1000 Gen. | 0.063 | 35704890 | 35596912 | rs10947562                                  | Intron 3 | NA             |
| dbSNP/1000 Gen. | 0.031 | 35703459 | 35595481 | rs141064452                                 | Intron 3 | NA             |
| dbSNP/1000 Gen. | 0.063 | 35702819 | 35594841 | rs181392730,rs76212347                      | Intron 3 | NA             |
| 1000 Genomes    | 0.031 | 35702644 | 35594666 | rs144714430                                 | Intron 3 | NA             |

|                 |       |          |          |                                             |          |                |
|-----------------|-------|----------|----------|---------------------------------------------|----------|----------------|
| dbSNP/1000 Gen. | 0.031 | 35701961 | 35593983 | rs7747121                                   | Intron 3 | NA             |
| NA              | <0.01 | 35701873 | 35593895 | NA                                          | Intron 3 | NA             |
| dbSNP/1000 Gen. | 0.031 | 35701836 | 35593858 | rs7743425                                   | Intron 3 | NA             |
| 1000 Genomes    | <0.01 | 35700795 | 35592817 | rs190824366                                 | Intron 3 | NA             |
| dbSNP/1000 Gen. | 0.313 | 35700722 | 35592744 | rs7748266                                   | Intron 3 | NA             |
| dbSNP/1000 Gen. | <0.01 | 35700518 | 35592540 | rs79134986                                  | Intron 3 | NA             |
| dbSNP/1000 Gen. | 0.375 | 35700253 | 35592275 | 1025,rs35508106,rs139922231,rs60605988,rs34 | Intron 3 | Score=173;CTCF |
| dbSNP/1000 Gen. | 0.063 | 35699311 | 35591333 | rs62402121                                  | Intron 3 | NA             |
| dbSNP/1000 Gen. | 0.469 | 35698890 | 35590912 | rs184674431,rs4713900                       | Intron 3 | NA             |
| dbSNP/1000 Gen. | 0.031 | 35698369 | 35590391 | rs16879318,rs111355550                      | Intron 3 | NA             |
| dbSNP/1000 Gen. | 0.031 | 35698253 | 35590275 | rs113805447                                 | Intron 3 | NA             |
| dbSNP/1000 Gen. | 0.031 | 35698135 | 35590157 | rs75118012,rs151248491                      | Intron 3 | NA             |
| dbSNP/1000 Gen. | 0.063 | 35698070 | 35590092 | rs7754668                                   | Intron 3 | NA             |
| dbSNP/1000 Gen. | 0.063 | 35697615 | 35589637 | rs72921231                                  | Intron 3 | NA             |
| dbSNP/1000 Gen. | 0.063 | 35697048 | 35589070 | rs9380524                                   | Intron 3 | NA             |
| dbSNP/1000 Gen. | 0.031 | 35696209 | 35588231 | rs74682753                                  | Intron 3 | NA             |
| NA              | <0.01 | 35694697 | 35586719 | NA                                          | Intron 4 | NA             |
| dbSNP/1000 Gen. | 0.063 | 35694351 | 35586373 | rs747411                                    | Intron 5 | NA             |
| dbSNP/1000 Gen. | 0.406 | 35693592 | 35585614 | rs9368878                                   | Intron 5 | NA             |
| dbSNP/1000 Gen. | 0.031 | 35693257 | 35585279 | rs79285437                                  | Intron 5 | NA             |
| dbSNP/1000 Gen. | 0.375 | 35693077 | 35585099 | rs12527893,rs72065011                       | Intron 5 | NA             |
| dbSNP/1000 Gen. | 0.031 | 35692412 | 35584434 | rs73748204                                  | Intron 5 | NA             |
| dbSNP/1000 Gen. | 0.313 | 35692033 | 35584055 | rs4401662                                   | Intron 5 | NA             |
| NA              | 0.031 | 35691495 | 35583517 | NA                                          | Intron 5 | NA             |
| NA              | <0.01 | 35691301 | 35583323 | NA                                          | Intron 5 | NA             |
| 1000 Genomes    | 0.063 | 35690739 | 35582761 | rs149450199                                 | Intron 5 | NA             |
| dbSNP/1000 Gen. | 0.063 | 35690639 | 35582661 | rs9470069                                   | Intron 5 | NA             |
| dbSNP/1000 Gen. | 0.031 | 35689864 | 35581886 | rs76813839                                  | Intron 5 | NA             |
| dbSNP/1000 Gen. | 0.063 | 35689781 | 35581803 | 72913427,rs150466730,rs114317890,rs1912343  | Intron 5 | NA             |
| dbSNP/1000 Gen. | 0.031 | 35689604 | 35581626 | rs73748203                                  | Intron 5 | NA             |
| 1000 Genomes    | <0.01 | 35689544 | 35581566 | rs185628664                                 | Intron 5 | NA             |
| dbSNP/1000 Gen. | 0.031 | 35688514 | 35580536 | rs190545247,rs75419538                      | Intron 5 | NA             |
| NA              | 0.031 | 35688376 | 35580398 | NA                                          | Intron 5 | NA             |
| dbSNP/1000 Gen. | 0.313 | 35688276 | 35580298 | rs6457836                                   | Intron 5 | NA             |
| dbSNP/1000 Gen. | 0.031 | 35687523 | 35579545 | rs114287508                                 | Intron 5 | NA             |
| dbSNP/1000 Gen. | 0.313 | 35687353 | 35579375 | rs6926133                                   | Intron 5 | NA             |
| dbSNP/1000 Gen. | 0.313 | 35686980 | 35579002 | rs3777747,rs117730957                       | Intron 5 | NA             |
| dbSNP/1000 Gen. | 0.031 | 35686829 | 35578851 | rs73746499                                  | Intron 5 | Score=604;GR   |
| dbSNP/1000 Gen. | <0.01 | 35686808 | 35578830 | rs116796504                                 | Intron 5 | Score=604;GR   |
| dbSNP/1000 Gen. | 0.031 | 35686162 | 35578184 | rs138734514,rs113080387                     | Intron 5 | NA             |
| NA              | 0.438 | 35684932 | 35576954 | NA                                          | Intron 5 | NA             |
| dbSNP/1000 Gen. | 0.031 | 35684834 | 35576856 | rs145658404,rs9470067                       | Intron 5 | NA             |
| dbSNP/1000 Gen. | <0.01 | 35684479 | 35576501 | rs142359398                                 | Intron 5 | NA             |
| 1000 Genomes    | 0.031 | 35684023 | 35576045 | rs147348090                                 | Intron 5 | NA             |
| dbSNP/1000 Gen. | 0.313 | 35683896 | 35575918 | rs10807152                                  | Intron 5 | NA             |
| dbSNP/1000 Gen. | 0.063 | 35683685 | 35575707 | rs72913423                                  | Intron 5 | NA             |





|                 |       |          |          |                                              |           |             |
|-----------------|-------|----------|----------|----------------------------------------------|-----------|-------------|
| dbSNP/1000 Gen. | 0.063 | 35667751 | 35559773 | rs10498734,rs188212504                       | Intron 6  | NA          |
| 1000 Genomes    | 0.031 | 35665809 | 35557831 | rs140730875                                  | Intron 7  | NA          |
| dbSNP/1000 Gen. | <0.01 | 35664887 | 35556909 | 8051,rs58812576,rs72406704,rs71002575,rs794  | Intron 7  | NA          |
| 1000 Genomes    | 0.031 | 35664843 | 35556865 | rs36223620                                   | Intron 7  | NA          |
| dbSNP/1000 Gen. | 0.250 | 35664498 | 35556520 | rs7771727                                    | Intron 7  | NA          |
| NA              | 0.219 | 35663769 | 35555791 | NA                                           | Intron 7  | NA          |
| dbSNP/1000 Gen. | 0.250 | 35663161 | 35555183 | rs992105                                     | Intron 7  | NA          |
| dbSNP/1000 Gen. | 0.063 | 35663088 | 35555110 | rs188553825,rs2294807                        | Intron 7  | NA          |
| dbSNP/1000 Gen. | 0.031 | 35663034 | 35555056 | rs186372061,rs73746494                       | Intron 7  | NA          |
| dbSNP/1000 Gen. | 0.031 | 35662244 | 35554266 | rs77612799                                   | Intron 8  | NA          |
| NA              | 0.063 | 35661339 | 35553361 | NA                                           | Intron 8  | NA          |
| dbSNP/1000 Gen. | 0.031 | 35661323 | 35553345 | rs144537644,rs73746492,rs73746493            | Intron 8  | NA          |
| dbSNP/1000 Gen. | 0.031 | 35661322 | 35553344 | rs144537644,rs73746492,rs73746493            | Intron 8  | NA          |
| dbSNP/1000 Gen. | 0.031 | 35660605 | 35552627 | rs16878591                                   | Intron 8  | NA          |
| dbSNP/1000 Gen. | 0.031 | 35660167 | 35552189 | rs73746491                                   | Intron 8  | NA          |
| dbSNP/1000 Gen. | 0.031 | 35659391 | 35551413 | rs7755289                                    | Intron 8  | NA          |
| dbSNP/1000 Gen. | 0.031 | 35658893 | 35550915 | rs59320339                                   | Intron 8  | NA          |
| 1000 Genomes    | 0.031 | 35658834 | 35550856 | rs10631894,rs34717528                        | Intron 8  | NA          |
| dbSNP/1000 Gen. | 0.031 | 35658181 | 35550203 | rs73746490                                   | Intron 8  | NA          |
| dbSNP/1000 Gen. | 0.031 | 35657920 | 35549942 | rs112124918                                  | Intron 8  | NA          |
| dbSNP/1000 Gen. | 0.063 | 35657648 | 35549670 | rs115829819,rs755658,rs184828383             | Intron 8  | NA          |
| 1000 Genomes    | <0.01 | 35657602 | 35549624 | rs140458482                                  | Intron 8  | NA          |
| dbSNP/1000 Gen. | 0.031 | 35656386 | 35548408 | rs111674784                                  | Intron 8  | NA          |
| dbSNP/1000 Gen. | 0.375 | 35656214 | 35548236 | rs7757037                                    | Intron 8  | NA          |
| dbSNP/1000 Gen. | <0.01 | 35655201 | 35547223 | rs146846979,rs114356859                      | Intron 9  | NA          |
| dbSNP/1000 Gen. | 0.031 | 35654872 | 35546894 | rs61188051                                   | Intron 9  | Score=67;GR |
| dbSNP/1000 Gen. | 0.063 | 35654844 | 35546866 | rs72913417                                   | Intron 9  | Score=67;GR |
| 1000 Genomes    | 0.250 | 35654729 | 35546751 | rs132,rs67988585,rs149689108,rs10626273,rs34 | Intron 9  | Score=67;GR |
| dbSNP/1000 Gen. | 0.031 | 35654383 | 35546405 | rs111375581                                  | Intron 9  | NA          |
| NA              | <0.01 | 35654052 | 35546074 | NA                                           | Intron 9  | NA          |
| 1000 Genomes    | <0.01 | 35653979 | 35546001 | rs188508079                                  | Intron 9  | NA          |
| NA              | 0.031 | 35653682 | 35545704 | NA                                           | Intron 9  | NA          |
| dbSNP/1000 Gen. | 0.031 | 35652920 | 35544942 | rs143893856,rs34866878                       | Exon 10   | NA          |
| dbSNP/1000 Gen. | 0.031 | 35652867 | 35544889 | rs146787424                                  | Exon 10   | NA          |
| dbSNP/1000 Gen. | 0.031 | 35652008 | 35544030 | rs56002954                                   | Intron 10 | NA          |
| dbSNP/1000 Gen. | 0.031 | 35651973 | 35543995 | rs45586932                                   | Intron 10 | NA          |
| dbSNP/1000 Gen. | 0.406 | 35651198 | 35543220 | rs111803919,rs146420608                      | 3'UTR     | NA          |
| dbSNP/1000 Gen. | 0.063 | 35650504 | 35542526 | rs11545925                                   | 3'UTR     | NA          |
| dbSNP/1000 Gen. | 0.344 | 35650454 | 35542476 | rs3800373                                    | 3'UTR     | NA          |
| dbSNP/1000 Gen. | 0.031 | 35650023 | 35542045 | rs41270080                                   | 3'UTR     | NA          |
| dbSNP/1000 Gen. | 0.188 | 35649410 | 35541432 | rs188433627,rs66957944,rs1043805,rs11545924  | 3'UTR     | NA          |
| NA              | <0.01 | 35649098 | 35541120 | NA                                           | 3'FR      | NA          |
| dbSNP/1000 Gen. | 0.344 | 35649036 | 35541058 | rs12055438                                   | 3'FR      | NA          |
| dbSNP/1000 Gen. | 0.250 | 35648846 | 35540868 | rs9470063                                    | 3'FR      | NA          |
