# Supplementary material for: Contribution of FKBP5 Genetic Variation to Gemcitabine Treatment and Survival in Pancreatic Adenocarcinoma
Source: PubMed Central journal article supplement (PMC3731355; doi:10.1371/journal.pone.0070216), 2013-08-01
Supplement: pone.0070216.s006.pdf [file pone.0070216.s006.pdf]

**Table S3.** Human FKBP5 gene Sanger resequencing. Polymorphisms in exons (2-11) and untranslated regions (UTRs) are numbered relative to the “A” nucleotide in the translation initiation codon in exon 2. Variant nucleotides located within introns are numbered based on their distance from the nearest splice junction, with negative numbers assigned to positions 5' to that location, and positive numbers for positions 3'.

| <b>FKBP5 Polymorphisms</b> |                   |                        |                          |                           |                                  |
|----------------------------|-------------------|------------------------|--------------------------|---------------------------|----------------------------------|
|                            |                   |                        |                          |                           | <b>Frequency of Minor Allele</b> |
| <b>Location</b>            | <b>Nucleotide</b> | <b>Sequence Change</b> | <b>Amino Acid Change</b> | <b>Pancreatic Samples</b> | <b>RefSNP ID</b>                 |
| 5'FR                       | -40325            | A→G                    |                          | 0.444                     | rs2766537                        |
| 5'FR                       | -40165            | G→A                    |                          | 0.016                     |                                  |
| 5'FR                       | -39802            | C→T                    |                          | 0.315                     | rs2817035                        |
| 5'FR                       | -39728            | A→G                    |                          |                           | rs2817034                        |
| 5'FR                       | -39718            | G→A                    |                          | 0.444                     | rs2817033                        |
| 5'FR                       | -31741            | C→A                    |                          | 0.008                     |                                  |
| 5'FR                       | -31397            | C→T                    |                          | 0.016                     |                                  |
| Intron 1                   | 18                | G→A                    |                          | 0.347                     | rs9462103                        |
| Intron 1                   | 150               | G→A                    |                          | 0.145                     | rs13215797                       |
| Intron 1                   | 478               | C→G                    |                          | 0.008                     |                                  |
| Intron 1                   | 597               | C→G                    |                          | 0.008                     |                                  |
| Intron 1                   | 607               | A→G                    |                          | 0.194                     | rs10947564                       |
| Intron 1                   | -131              | T→A                    |                          | 0.056                     | rs12527329                       |
| Intron 1                   | -61               | G→A                    |                          | 0.258                     | rs2143404                        |
| Exon 2                     | 49                | A→G                    | Thr(17)Ala               | 0.016                     |                                  |
| Intron 2                   | 157               | G→A                    |                          | 0.040                     | rs12110366                       |
| Intron 2                   | 189               | T→G                    |                          | 0.371                     | rs6902124                        |
| Intron 3                   | 96                | A→T                    |                          | 0.040                     | rs73748205                       |
| Intron 3                   | 146               | C→T                    |                          | 0.266                     | rs7746850                        |
| Exon 10                    | 1095              | C→T                    |                          | 0.040                     | rs34866878                       |
| Exon 10                    | 1148              | A→T                    | Gln(383)Leu              | 0.016                     |                                  |
| Intron 10                  | -311              | A→C                    |                          | 0.040                     | rs56002954                       |
| Intron 10                  | -276              | C→T                    |                          | 0.040                     | rs45586932                       |
