# Supplementary material for: Contribution of FKBP5 Genetic Variation to Gemcitabine Treatment and Survival in Pancreatic Adenocarcinoma
Source: PubMed Central journal article supplement (PMC3731355; doi:10.1371/journal.pone.0070216), 2013-08-01
Supplement: pone.0070216.s007.pdf [file pone.0070216.s007.pdf]

**Table S4.** Oligonucleotide sequences for site-directed mutagenesis and reporter gene assay, and EMSA probes. (A) Site-directed mutagenesis oligonucleotide sequences. Underlined nucleotides are responsible for amino acid changes. (B) Sequences of oligonucleotides used to perform PCR reactions to amplify regions surrounding indicated SNPs for luciferase reporter gene constructs using patients DNA as a template. Underlined nucleotides represent the restriction enzyme site, Acc65I for forward primer and Mlu1 for reverse. (C) EMSA probes.

| <b>A) Site Directed Mutagenesis Primers</b> |         |                                                 |  |
|---------------------------------------------|---------|-------------------------------------------------|--|
| <i>SNP (FKBP5)</i>                          |         | <i>Probe Sequence</i>                           |  |
| Thr(22)Ala                                  | forward | 5'- GAAAGCCCCACAGCC <u>G</u> CTGTTGCTGAGCAGG-3' |  |
|                                             | reverse | 5'- CCTGCTCAGCAACAGCGGCTGTGGGGCTTTC-3'          |  |
| Glu(383)Leu                                 | forward | 5'- GGAAGTAAACCC <u>CT</u> GAATAAGGCTGCAAG-3'   |  |
|                                             | reverse | 5'- CTTGCAGCCTTATTCAGGGGGTTTACTTCC-3'           |  |

  

| <b>B) Reporter gene assay</b> |         |                                               |                          |
|-------------------------------|---------|-----------------------------------------------|--------------------------|
| <i>SNP</i>                    |         | <i>Oligonucleotide Sequence</i>               | <i>product size (bp)</i> |
| rs148128369                   | forward | 5'- TAG <u>GTAC</u> CTTTCTGGGGATTCACA-3'      | 469                      |
|                               | reverse | 5'- TAA <u>CGCGT</u> AGTCCTTCCATCTCA-3'       |                          |
| rs116796504                   | forward | 5'- TAG <u>GTAC</u> CTTTTCAGTCCTTGCTGCAAAC-3' | 571                      |
|                               | reverse | 5'- TAA <u>CGCGT</u> AACAGAGTGTCTACAGGTCCA-3' |                          |
| rs73746499                    | forward | 5'- TAG <u>GTAC</u> CTTTTCAGTCCTTGCTGCAAAC-3' | 571                      |
|                               | reverse | 5'- TAA <u>CGCGT</u> AACAGAGTGTCTACAGGTCCA-3' |                          |
| rs73748206                    | forward | 5'- TAG <u>GTACC</u> CTTTCTCAGATTCAGTT-3'     | 401                      |
|                               | reverse | 5'- TAA <u>CGCGT</u> ACCACTGTTTTACAATTGCC-3'  |                          |

  

| <b>C) EMSA</b> |           |                       |                                    |
|----------------|-----------|-----------------------|------------------------------------|
| <i>SNP</i>     |           | <i>Probe Sequence</i> |                                    |
| rs73748206     | wild type | F                     | 5'- ATGTTACATAAGGATGAAATCATCT-3'   |
|                |           | R                     | 5'- AGATGATTTTCATCCTTATGTGAACAT-3' |
|                | variant   | F                     | 5'- ATGTTACATAAAGATGAAATCATCT-3'   |
|                |           | R                     | 5'- AGATGATTTTCATCTTTATGTGAACAT-3' |
