# Supplementary material for: Contribution of FKBP5 Genetic Variation to Gemcitabine Treatment and Survival in Pancreatic Adenocarcinoma
Source: PubMed Central journal article supplement (PMC3731355; doi:10.1371/journal.pone.0070216), 2013-08-01
Supplement: pone.0070216.s009.pdf [file pone.0070216.s009.pdf]

**Table S6.** List of top window SNPs from sliding window association analysis with average FKBP5 expression and overall survival. In bold are the SNPs selected for functional characterization. SNP, single nucleotide polymorphism; Chr., chromosomal.

| <b>Top Window SNPs from Sliding Window Association Analysis</b> |                          |                         |                          |          |                          |
|-----------------------------------------------------------------|--------------------------|-------------------------|--------------------------|----------|--------------------------|
| <b>Average Expression</b>                                       |                          | <b>Overall Survival</b> |                          |          |                          |
| <b>#</b>                                                        | <b>SNP Chr. Location</b> | <b>#</b>                | <b>SNP Chr. Location</b> | <b>#</b> | <b>SNP Chr. Location</b> |
| 1                                                               | 35780536                 | 1                       | 35721310                 | 26       | 35701961                 |
| 2                                                               | 35780435                 | 2                       | 35721176                 | 27       | 35701836                 |
| 3                                                               | 35779935                 | 3                       | <b>35720889</b>          | 28       | 35700795                 |
| 4                                                               | 35777852                 | 4                       | 35719458                 | 29       | 35700518                 |
| 5                                                               | 35777525                 | 5                       | 35718531                 | 30       | 35699311                 |
| 6                                                               | 35777278                 | 6                       | 35718318                 | 31       | 35698369                 |
| 7                                                               | 35776478                 | 7                       | 35718242                 | 32       | 35698253                 |
| 8                                                               | 35776462                 | 8                       | 35717519                 | 33       | 35698135                 |
| 9                                                               | 35776273                 | 9                       | 35716324                 | 34       | 35696209                 |
| 10                                                              | 35776119                 | 10                      | 35716217                 | 35       | 35694697                 |
| 11                                                              | 35774523                 | 11                      | 35715938                 | 36       | 35693257                 |
| 12                                                              | 35773746                 | 12                      | <b>35715933</b>          | 37       | 35692412                 |
| 13                                                              | 35772983                 | 13                      | 35715599                 | 38       | 35691495                 |
| 14                                                              | 35772111                 | 14                      | 35715307                 | 39       | 35691301                 |
| 15                                                              | 35771396                 | 15                      | 35714379                 | 40       | 35690739                 |
| 16                                                              | 35771004                 | 16                      | 35714013                 | 41       | 35689864                 |
| 17                                                              | 35769956                 | 17                      | 35712673                 | 42       | 35689604                 |
| 18                                                              | 35769207                 | 18                      | 35711567                 | 43       | 35688514                 |
| 19                                                              | 35768679                 | 19                      | 35709774                 | 44       | 35688376                 |
| 20                                                              | 35768574                 | 20                      | 35709507                 | 45       | 35687523                 |
| 21                                                              | 35767825                 | 21                      | 35707732                 | 46       | <b>35686829</b>          |
| 22                                                              | 35766403                 | 22                      | 35705868                 | 47       | <b>35686808</b>          |
| 23                                                              | 35764231                 | 23                      | 35705681                 | 48       | 35686162                 |
| 24                                                              | 35763962                 | 24                      | 35703459                 | 49       | 35684834                 |
| 25                                                              | 35760898                 | 25                      | 35702644                 | 50       | 35684479                 |
