# Supplementary material for: Contribution of FKBP5 Genetic Variation to Gemcitabine Treatment and Survival in Pancreatic Adenocarcinoma
Source: PLOS journal article supplement (doi:10.1371/journal.pone.0070216), 2013-08-01
Supplement: S8 (10.1371/journal.pone.0070216.s008) [file journal.pone.0070216.s008]

**Table S5.** Novel insertions/deletions (Indels) detected by Next Generation resequencing analysis of pancreatic patients DNA samples.

---

| <b>Novel Indels (Insertions/Deletions) Detected by NextGen Analysis in Pancreatic Samples Cohort</b> |                    |
|------------------------------------------------------------------------------------------------------|--------------------|
| <b>Location; hg19</b>                                                                                | <b>In/del Type</b> |
| 35679998                                                                                             | deletion of G      |
| 35672457                                                                                             | deletion of AGTA   |
| 35663418                                                                                             | insertion of TTT   |

---
